# Supplementary material for: Consumer-Based Wearable Activity Trackers Increase Physical Activity Participation: Systematic Review and Meta-Analysis
Source: PubMed Central journal article supplement (PMC6484266; doi:10.2196/11819), 2019-04-12
Supplement: mhealth_v7i4e11819_app2.pdf [file mhealth_v7i4e11819_app2.pdf]

## Exclusion Criteria

1. Not a human study population
2. Paediatric population
3. Wrong Intervention (didn't include use of a wearable activity monitor)
4. Wrong Comparator
5. Wrong study design
6. No control group
7. Ongoing study / no results reported
8. Conference abstract
9. Review paper
