# Supplementary material for: Consumer-Based Wearable Activity Trackers Increase Physical Activity Participation: Systematic Review and Meta-Analysis
Source: PubMed Central journal article supplement (PMC6484266; doi:10.2196/11819), 2019-04-12
Supplement: mhealth_v7i4e11819_app3.pdf [file mhealth_v7i4e11819_app3.pdf]

| Study                                   | Duration                                         | Participants                                                  | Intervention                                                                                                                                                                                                                                                                      | Wearable based/<br>Multi-faceted                 | n   | Age (yr)    | BMI                                   | Gender   |
|-----------------------------------------|--------------------------------------------------|---------------------------------------------------------------|-----------------------------------------------------------------------------------------------------------------------------------------------------------------------------------------------------------------------------------------------------------------------------------|--------------------------------------------------|-----|-------------|---------------------------------------|----------|
| Ashe, Winters et al.<br># [29]          | 6 months                                         | Sedentary women (55-70yrs)                                    | <b>Intervention</b> – Group based education + Fitbit One AT<br><b>Control</b> – Group based education                                                                                                                                                                             | Multi-faceted                                    | 20  | 63.9 (4.7)  | 29.9 (6.8)                            | F: 100%  |
| Ashton, Morgan et al.<br># [30]         | 3 months                                         | Sedentary young men (18-25yrs)                                | <b>Intervention</b> – Group based education + Jawbone AT<br><b>Control</b> – Waitlist                                                                                                                                                                                             | Multi-faceted                                    | 50  | 21.1 (2.0)  | 25.5 (4.6)                            | M: 100%  |
| Barwais, Cuddihy et al.<br># [31]       | 4 weeks                                          | Sedentary Adults                                              | <b>Intervention</b> – Gruve AT with online software<br><b>Control</b> – Usual lifestyle                                                                                                                                                                                           | Wearable-based                                   | 33  | 27.7 (3.7)  | WEIGHT: 78.0 (22.5)                   | F: 33.3% |
| Brakenridge, Fjdsoe et al.<br># [32]    | 12 months                                        | Office workers                                                | <b>Intervention</b> – Organisational wellness program + LUMOback AT<br><b>Control</b> – Organisational wellness program                                                                                                                                                           | Multi-faceted                                    | 153 | 38.9 (8.0)  | 24.6 (3.4)                            | F: 46%   |
| Cadmus-Bertram, Marcus et al.<br># [21] | 16 weeks                                         | Sedentary, post menopausal women with BMI >25                 | <b>Intervention</b> – Fitbit One AT + written information + phone call<br><b>Control</b> – Pedometer + written information                                                                                                                                                        | Multi-faceted                                    | 52  | 59.9 (7.0)  | 29.1 (3.5)                            | F: 100%  |
| Duncan, Vandelanotte et al.<br># [33]   | 9 weeks                                          | Sedentary Adults (18-55yrs)                                   | <b>Intervention</b> – Fitbit Charge HR AT+ study specific smartphone app<br><b>Control</b> – Smartphone app                                                                                                                                                                       | Wearable-based                                   | 64  | 35.8 (10.2) | 27.3 (4.5)                            | F: 75%   |
| Finkelstein, Haaland et al.<br># [34]   | <b>6-month intervention</b><br>6 month follow-up | Office workers (21-65yrs)                                     | <b>Intervention 1</b> – Fitbit Zip AT + written information<br><b>Intervention 2</b> – Fitbit Zip AT + written information + charity donation incentives<br><b>Intervention 3</b> – Fitbit Zip AT + written information + cash incentives<br><b>Control</b> – Written information | Wearable-based<br>Multi-faceted<br>Multi-faceted | 800 | 35.5 (8.5)  | WEIGHT: 66.1 (64.1-68.0) <sup>a</sup> | F: 53.7% |
| Hartman, Nelson et al. 2016<br># [35]   | 6 months                                         | Women with BMI >27.5 & elevated breast cancer risk (40-75yrs) | <b>Intervention</b> – Fitbit One AT + regular phone calls<br><b>Control</b> – Written information + 2 x brief phone calls                                                                                                                                                         | Multi-faceted                                    | 54  | 59.6 (5.7)  | 31.7 (3.5)                            | F: 100%  |

|                                       |                                      |                                                             |                                                                                                                                                                                                                                |                                |     |                                |                                |          |
|---------------------------------------|--------------------------------------|-------------------------------------------------------------|--------------------------------------------------------------------------------------------------------------------------------------------------------------------------------------------------------------------------------|--------------------------------|-----|--------------------------------|--------------------------------|----------|
| Hartman, Nelson et al. 2018<br># [36] | 12 weeks                             | Sedentary, female breast cancer survivors (21-85 yrs)       | <b>Intervention</b> – Fitbit One AT + 2 x phone calls + regular emails<br><b>Control</b> – Waitlist + regular emails (generic health topics)                                                                                   | Multi-faceted                  | 87  | 57.2 (10.3)                    | 27 (6.3)                       | F: 100%  |
| Jakicic, Davis et al.<br># [37]       | 24 months                            | Adults with BMI >25 but <40 (25-40yrs)                      | <b>Intervention</b> – 0-6 months: group-based education. 7-24 months: FitCore AT + group-based education + weekly text messages + monthly phone calls<br><b>Control</b> – As per intervention but no activity tracker provided | Multi-faceted                  | 470 | 30.9 (18. – 35.9) <sup>b</sup> | 1.2 (24.4 – 39.9) <sup>b</sup> | F: 71.1% |
| Jauho, Pyly et al.<br># [38]          | 3 months                             | Conscription aged men (assessed in the year they turned 18) | <b>Intervention</b> – Polar Active AT<br><b>Control</b> – Blinded Polar Active AT                                                                                                                                              | Wearable-based                 | 276 | 18.0 (0.9)                     | 23.4 (4.5)                     | M: 100%  |
| Li, Sayre et al.<br># [39]            | 1 month                              | Adults with knee OA (50yrs +)                               | <b>Intervention</b> – Fitbit Flex AT + weekly phone calls + education sessions<br><b>Control</b> – Waitlist                                                                                                                    | Multi-faceted                  | 34  | 55.5 (8.6)                     | 27.2 (4.7)                     | F: 82%   |
| Lyons, Swarz et al.<br># [40]         | 12 weeks                             | Adults with BMI >25 but <35 (55-79yrs)                      | <b>Intervention</b> – Jawbone UP 24 AT + idle alert + weekly phone calls<br><b>Control</b> – Waitlist                                                                                                                          | Multi-faceted                  | 40  | 61.5 (5.6)                     | 30.3 (3.5)                     | F: 85%   |
| Martin, Feldman et al.<br># [41]      | <b>P1: 2 wks</b><br><b>P2: 2 wks</b> | Adults (18-69yrs)                                           | <b>Intervention</b> – Fitbug AT + 3 x daily text messages<br><b>Control</b> – Blinded Fitbug AT                                                                                                                                | Wearable-based                 | 48  | 58 (8)                         | 31 (6)                         | F: 46%   |
| Melton, Buman et al.<br># [42]        | <b>6 weeks</b><br>8-week follow-up   | College aged African American women (18-24yrs)              | <b>Intervention</b> – Jawbone UP AT + weekly emails<br><b>Control</b> – Dietary intake self-monitoring through MyFitnessPal + weekly emails                                                                                    | Wearable-based                 | 69  | 19.7 (1.8)                     | 27.3 (6.8)                     | F: 100%  |
| Pellegrini, Vebra et al.<br># [43]    | 6 months                             | Overweight adults (21-55yrs)                                | <b>Intervention 1</b> – Group based education + BodyMedia Fit AT<br><b>Intervention 2</b> – BodyMedia Fit AT + written information + phone calls<br><b>Control</b> – Group education sessions                                  | Multi-faceted<br>Multi-faceted | 51  | 44.2 (8.7)                     | 33.7 (3.6)                     | F: 86.3% |
| Poirier, Bennett et al                | 6 weeks                              | Office workers                                              | <b>Intervention</b> – Pebble+ AT + online walking program + 4 x daily text messages<br><b>Control</b> – Usual lifestyle                                                                                                        | Wearable-based                 | 265 | 39.9 (11.7)                    | -                              | F: 66%   |

|                                     |                                                          |                                                          |                                                                                                                                                                                                                                                      |                |     |                         |                               |          |  |
|-------------------------------------|----------------------------------------------------------|----------------------------------------------------------|------------------------------------------------------------------------------------------------------------------------------------------------------------------------------------------------------------------------------------------------------|----------------|-----|-------------------------|-------------------------------|----------|--|
| # [44]                              |                                                          |                                                          |                                                                                                                                                                                                                                                      |                |     |                         |                               |          |  |
| Polzien, Jakicic et al.             | 12 weeks                                                 | Adults (18-55yrs)                                        | <b>Intervention 1</b> – BodyMedia Sensewear armband AT + individual counselling sessions<br><b>Intervention 2</b> – As per intervention 1 but AT only worn during weeks 1, 5 and 9<br><b>Control</b> - Individual education sessions                 | Multi-faceted  | 57  | 41.3 (8.7)              | 33.1 (2.8)                    | F: 98%   |  |
| # [45]                              |                                                          |                                                          |                                                                                                                                                                                                                                                      | Multi-faceted  |     |                         |                               |          |  |
| Rogers, Lang et al.                 | 6 months                                                 | Adults (21-55yrs)                                        | <b>Intervention 1</b> – BodyMedia Fit + written information + monthly phone calls<br><b>Intervention 2</b> – BodyMedia Fit + smartphone app + written information + monthly phone calls<br><b>Control</b> – Group based education                    | Multi-faceted  | 39  | 39.9 (11.5)             | 39.5 (2.8)                    | F: 79.5% |  |
| # [46]                              |                                                          |                                                          |                                                                                                                                                                                                                                                      | Multi-faceted  |     |                         |                               |          |  |
| Shin, Yun et al.                    | 12 weeks                                                 | Male students (19-45yrs)                                 | <b>Intervention 1</b> – Fitmeter AT + study specific smartphone app + written information<br><b>Intervention 2</b> – As per intervention 1 plus financial incentives for reaching step and body weight goals<br><b>Control</b> – Written information | Wearable-based | 35  | 27.8 (5.0)              | 29.8 (2.7)                    | M: 100%  |  |
| # [47]                              |                                                          |                                                          |                                                                                                                                                                                                                                                      | Multi-faceted  |     |                         |                               |          |  |
| Skrepnik, Spritzer et al.           | 90 days                                                  | Adults with knee OA eligible for Hylan G-F 20 (30-80yrs) | <b>Intervention</b> – Jawbone UP 24 AT + study specific smartphone app + written information<br><b>Control</b> – Blinded Jawbone UP 24 AT + written information                                                                                      | Wearable-based | 211 | 62.6 (9.4)              | 29.3 (3.7)                    | F:50.2%  |  |
| # [22]                              |                                                          |                                                          |                                                                                                                                                                                                                                                      |                |     |                         |                               |          |  |
| Slootmaker, Chinapaw et al.         | 3 months                                                 | Office workers (20-40yrs)                                | <b>Intervention</b> – Pam AT + interactive website<br><b>Control</b> – Written information                                                                                                                                                           | Wearable-based | 102 | 31.8(3.5)               | 25.2 (4.1)                    | F: 60%   |  |
| # [48]                              |                                                          |                                                          |                                                                                                                                                                                                                                                      |                |     |                         |                               |          |  |
| Thompson, Kuhle et al. <sup>c</sup> | 12 months (6-month cross over)                           | Sedentary, overweight older adults (65-95yrs)            | <b>Intervention</b> – Fitbit AT + written information + weekly phone calls + bi-monthly individual education sessions<br><b>Control</b> – Blinded Fitbit AT                                                                                          | Multi-faceted  | 48  | 79.5 (7.0)              | WEIGHT: 78.4 (13.5)           | F: 81%   |  |
| # [49]                              |                                                          |                                                          |                                                                                                                                                                                                                                                      |                |     |                         |                               |          |  |
| Thorndike, Mills et al.             | <b>Phase 1:</b><br>6 weeks<br><b>Phase 2:</b><br>6 weeks | Medical residents                                        | <b>Intervention</b> –Fitbit AT + weekly email reminders with offer of incentives for wearing device<br><b>Control</b> – As per intervention but with a blinded Fitbit AT                                                                             | Multi-faceted  | 104 | 29 (23-37) <sup>a</sup> | 24.1 (17.8-35.6) <sup>a</sup> | F: 54%   |  |
| # [50]                              |                                                          |                                                          |                                                                                                                                                                                                                                                      |                |     |                         |                               |          |  |

|                                              |                                      |                                                    |                                                                                                                                                                                                                                                                                                                        |                                                      |     |             |            |          |
|----------------------------------------------|--------------------------------------|----------------------------------------------------|------------------------------------------------------------------------------------------------------------------------------------------------------------------------------------------------------------------------------------------------------------------------------------------------------------------------|------------------------------------------------------|-----|-------------|------------|----------|
| Unick, O'Leary et al.<br># [51]              | 6 months                             | Obese, sedentary adults (21-55yrs)                 | <b>Intervention</b> – Group based education + Body Media Fit AT<br><b>Control</b> – Group based education                                                                                                                                                                                                              | Multi-faceted                                        | 29  | 42.4 (9.2)  | 45.0 (3.9) | F: 82%   |
| Valle, Deal et al.<br># [52]                 | 6 months                             | African American breast cancer survivors (18yrs +) | <b>Intervention 1</b> – Individual education sessions, weekly emails, smartphone app paired with wi-fi scales. <i>No use of an activity tracker</i><br><b>Intervention 2</b> – As per intervention 1 + Withings AT<br><b>Control</b> – waitlist                                                                        | No AT used<br><br>Multi-faceted                      | 35  | 53.1 (9.1)  | 34.0 (6.0) | F: 100%  |
| van der Weegen, Verwey et al.<br># [53]      | <b>6 months</b><br>3-month follow-up | Primary care patients with T2DM or COPD (40-70yrs) | <b>Intervention 1</b> – 4 x consultations with practice nurse. <i>No use of an AT</i><br><b>Intervention 2</b> – As per intervention 1 + unspecified AT + smartphone and web app<br><b>Control</b> – Usual care                                                                                                        | No AT used<br><br>Multi-faceted                      | 199 | 57.9 (7.6)  | 29.4 (5.3) | F: 51.3% |
| Van Hoya, Boen et al. <sup>c</sup><br># [54] | 4-weeks                              | Adults aged (19-67 yrs)                            | <b>Intervention 1</b> – Pedometer. <i>No use of an AT</i><br><b>Intervention 2</b> – BodyMedia Sensewear armband AT<br><b>Intervention 3</b> – BodyMedia Sensewear armband AT + weekly sessions with a personal coach<br><b>Control</b> – Baseline measures discussed in relation to national activity recommendations | No AT used<br><br>Wearable-only<br><br>Multi-faceted | 221 | 42.4 (10.4) | 27.1 (4.0) | F: 54.3% |

AT = Activity tracker, <sup>a</sup> = range, <sup>b</sup> = 25<sup>th</sup>-75<sup>th</sup> percentile, <sup>c</sup> = studies not included in meta-analysis
